# Supplementary material for: Divergent expression of aristaless1 and aristaless2 during embryonic appendage and pupal wing development in butterflies
Source: Springer Nature journal article supplement (doi:10.1186/s12915-023-01602-5), 2023-05-11

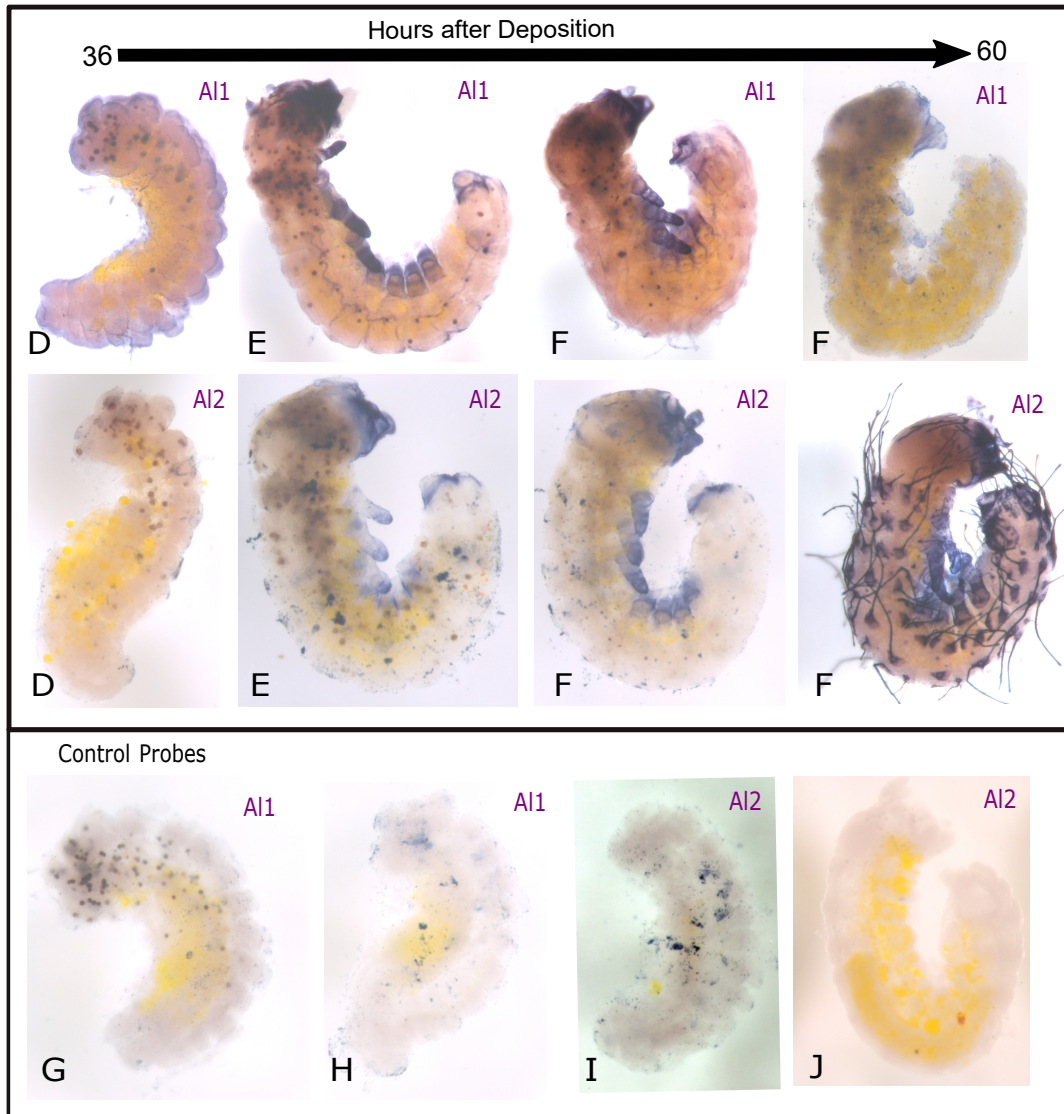

Supplement: MOESM1 [file 12915_2023_1602_MOESM1_ESM.pdf]
